# Supplementary material for: Genetic Diversity of Fusarium oxysporum f. sp. cubense, the Fusarium Wilt Pathogen of Banana, in Ecuador
Source: MDPI journal article supplement (doi:10.3390/plants9091133), 2020-09-01
Supplement: s1 [file s1]

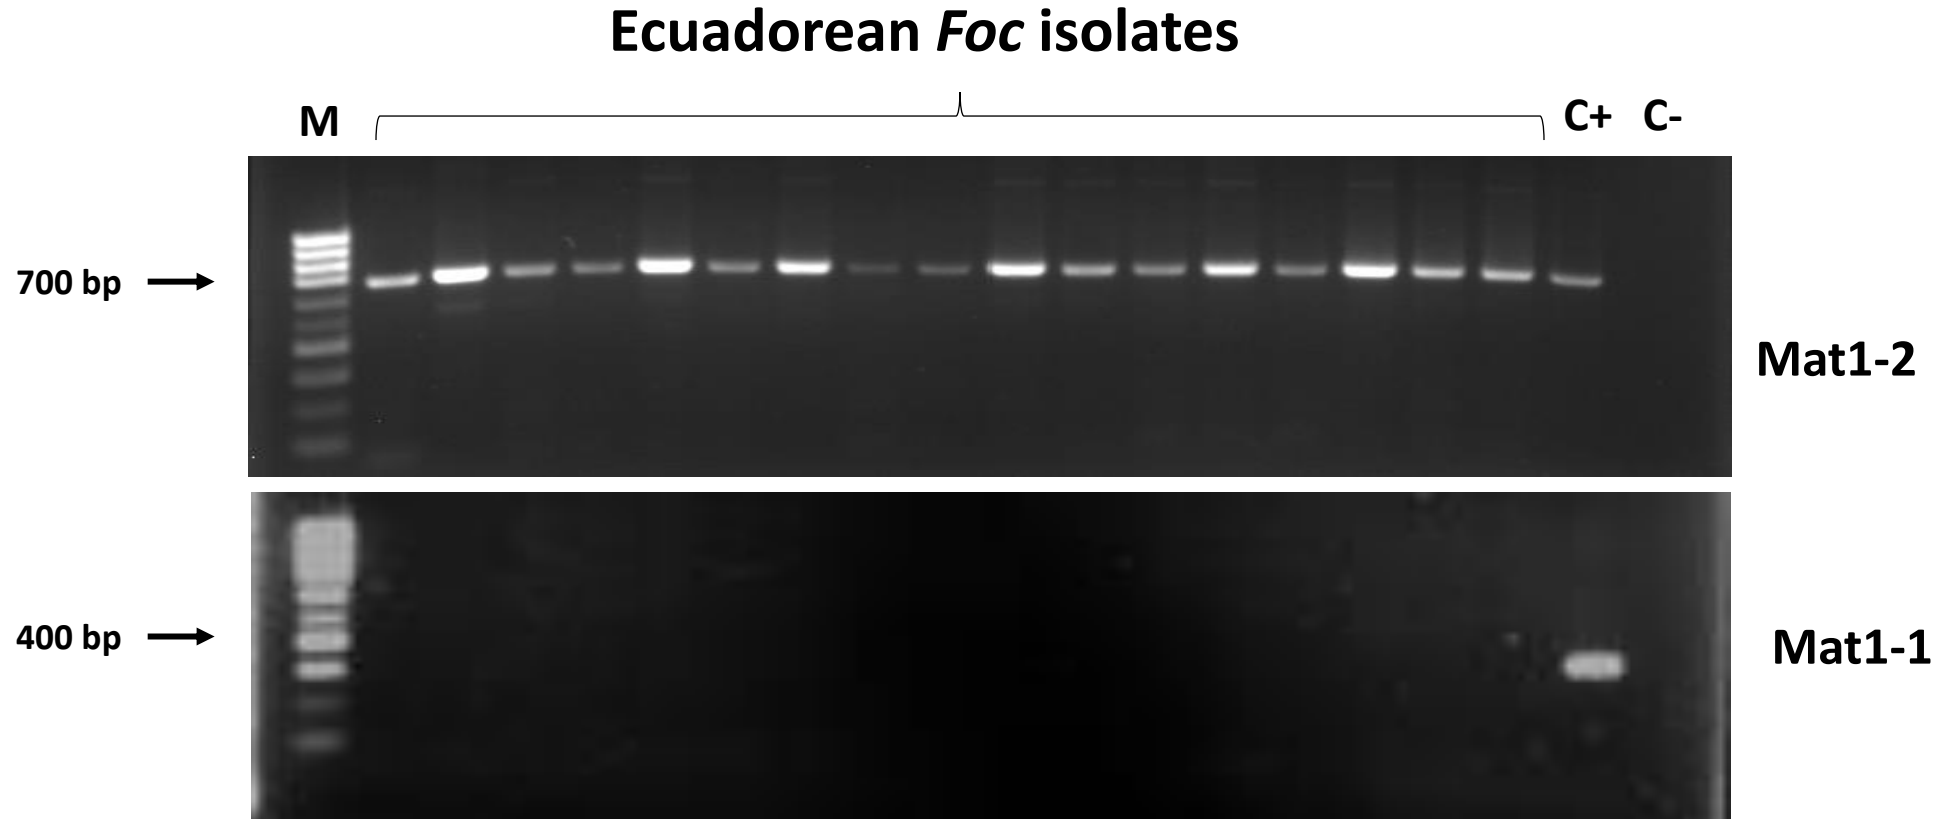

**Figure S2.** Polymerase chain reaction (PCR) analysis showing the presence of MAT1-2 idiomorph amplified with the specific primers FF1 and Gfmat2c on representatives *Foc* isolates of Ecuador. PCR product visualization was carried out following electrophoresis in a 0,8% agarose gel.
