# Supplementary material for: Genetic Diversity of Fusarium oxysporum f. sp. cubense, the Fusarium Wilt Pathogen of Banana, in Ecuador
Source: Plants (Basel). 2020 Sep 1;9(9):1133. doi: 10.3390/plants9091133 (PMC7570379; doi:10.3390/plants9091133)
Supplement: Supplementary file 1 [file plants-09-01133-s001.zip]

Archive with 4 entries (4 files):
- Figure S1.pdf
- Figure S2.pdf
- Supplementary Table S1.xlsx
- Supplementary Table S2.xlsx
