# Supplementary material for: Genetic Diversity of Fusarium oxysporum f. sp. cubense, the Fusarium Wilt Pathogen of Banana, in Ecuador
Source: Plants (Basel). 2020 Sep 1;9(9):1133. doi: 10.3390/plants9091133 (PMC7570379; doi:10.3390/plants9091133)
Supplement: Supplementary file 1 [file plants-09-01133-s001.zip › Supplementary Table S1.xlsx]

## Sheet: Hoja1
	Fusarium oxysporum isolates associated to banana from Ecuador used in this study
	Isolate code	Province	Location	Species - f.sp.	Host/cultivar	Genome	Plant status	Isolation tissue	Mat1-1	Mat1-2
	EC1-E-GM1	Esmeraldas	La concordia	F. oxysporum f.sp. cubense	'Gros Michel'	AAA	Symptomatic	Pseudostem	−	+
	EC2-E-GM2	Esmeraldas	La concordia	F. oxysporum f.sp. cubense	'Gros Michel'	AAA	Symptomatic	Pseudostem	−	+
	EC2-E-GM2	Esmeraldas	La concordia	F. oxysporum f.sp. cubense	'Gros Michel'	AAA	Symptomatic	Pseudostem	−	+
	EC3-E-GM1	Esmeraldas	N/D	F. oxysporum f.sp. cubense	'Gros Michel'	AAA	Symptomatic	Pseudostem	−	+
	EC4-E-GM1	Esmeraldas	Palmar real-Biche	F. oxysporum f.sp. cubense	'Gros Michel'	AAA	Symptomatic	Pseudostem	−	+
	EC4-E-GM2	Esmeraldas	Palmar real-Biche	F. oxysporum f.sp. cubense	'Gros Michel'	AAA	Symptomatic	Pseudostem	−	+
	EC4-E-GM3	Esmeraldas	Palmar real-Biche	F. oxysporum f.sp. cubense	'Gros Michel'	AAA	Symptomatic	Pseudostem	−	+
	EC7-E-GM1	Esmeraldas	Chinca	F. oxysporum f.sp. cubense	'Gros Michel'	AAA	Symptomatic	Pseudostem	−	+
	EC8-E-GM1	Esmeraldas	Chinca	F. oxysporum f.sp. cubense	'Gros Michel'	AAA	Symptomatic	Pseudostem	−	+
	EC8-E-GM2	Esmeraldas	Chinca	F. oxysporum f.sp. cubense	'Gros Michel'	AAA	Symptomatic	Pseudostem	−	+
	EC8-E-GM3	Esmeraldas	Chinca	F. oxysporum f.sp. cubense	'Gros Michel'	AAA	Symptomatic	Pseudostem	−	+
	EC10-E-GM2	Esmeraldas	Borbon	F. oxysporum f.sp. cubense	'Gros Michel'	AAA	Symptomatic	Pseudostem	−	+
	EC12-E-GM1	Esmeraldas	Bellavista	F. oxysporum f.sp. cubense	'Gros Michel'	AAA	Symptomatic	Pseudostem	−	+
	EC12-E-GM2	Esmeraldas	Bellavista	F. oxysporum f.sp. cubense	'Gros Michel'	AAA	Symptomatic	Pseudostem	−	+
	EC12-E-GM3	Esmeraldas	Bellavista	F. oxysporum f.sp. cubense	'Gros Michel'	AAA	Symptomatic	Pseudostem	−	+
	EC14-E-GM1	Esmeraldas	Sua	F. oxysporum f.sp. cubense	'Gros Michel'	AAA	Symptomatic	Pseudostem	−	+
	EC15-E-GM1	Esmeraldas	Sua	F. oxysporum f.sp. cubense	'Gros Michel'	AAA	Symptomatic	Pseudostem	−	+
	EC15-E-GM2	Esmeraldas	Sua	F. oxysporum f.sp. cubense	'Gros Michel'	AAA	Symptomatic	Pseudostem	−	+
	EC16-E-GM1	Esmeraldas	Sua	F. oxysporum f.sp. cubense	'Gros Michel'	AAA	Symptomatic	Pseudostem	−	+
	EC16-E-GM2	Esmeraldas	Sua	F. oxysporum f.sp. cubense	'Gros Michel'	AAA	Symptomatic	Pseudostem	−	+
	EC16-E-GM3	Esmeraldas	Sua	F. oxysporum f.sp. cubense	'Gros Michel'	AAA	Symptomatic	Pseudostem	−	+
	EC17-E-GM1	Esmeraldas	Sua	F. oxysporum f.sp. cubense	'Gros Michel'	AAA	Symptomatic	Pseudostem	−	+
	EC18-E-GM1	Esmeraldas	Abdon Calderon	F. oxysporum f.sp. cubense	'Gros Michel'	AAA	Symptomatic	Pseudostem	−	+
	EC19-E-GM1	Esmeraldas	Muisne	F. oxysporum f.sp. cubense	'Gros Michel'	AAA	Symptomatic	Pseudostem	−	+
	EC19-E-GM2	Esmeraldas	Muisne	F. oxysporum f.sp. cubense	'Gros Michel'	AAA	Symptomatic	Pseudostem	−	+
	EC20-E-GM1	Esmeraldas	Muisne	F. oxysporum f.sp. cubense	'Gros Michel'	AAA	Symptomatic	Pseudostem	−	+
	EC20-E-GM2	Esmeraldas	Muisne	F. oxysporum f.sp. cubense	'Gros Michel'	AAA	Symptomatic	Pseudostem	−	+
	EC1-M-GM1	Manabi	El Carmen	F. oxysporum f.sp. cubense	'Gros Michel'	AAA	Symptomatic	Pseudostem	−	+
	EC1-M-GM2	Manabi	El Carmen	F. oxysporum f.sp. cubense	'Gros Michel'	AAA	Symptomatic	Pseudostem	−	+
	EC2-M-GM1	Manabi	El Carmen	F. oxysporum f.sp. cubense	'Gros Michel'	AAA	Symptomatic	Pseudostem	−	+
	EC2-M-GM2	Manabi	El Carmen	F. oxysporum f.sp. cubense	'Gros Michel'	AAA	Symptomatic	Pseudostem	−	+
	EC3-M-GM1	Manabi	El Carmen	F. oxysporum f.sp. cubense	'Gros Michel'	AAA	Symptomatic	Pseudostem	−	+
	EC3-M-GM2	Manabi	El Carmen	F. oxysporum f.sp. cubense	'Gros Michel'	AAA	Symptomatic	Pseudostem	−	+
	EC4-M-GM1	Manabi	El Carmen	F. oxysporum f.sp. cubense	'Gros Michel'	AAA	Symptomatic	Pseudostem	−	+
	EC4-M-GM2	Manabi	El Carmen	F. oxysporum f.sp. cubense	'Gros Michel'	AAA	Symptomatic	Pseudostem	−	+
	EC5-M-GM1	Manabi	El Carmen	F. oxysporum f.sp. cubense	'Gros Michel'	AAA	Symptomatic	Pseudostem	−	+
	EC5-M-GM2	Manabi	El Carmen	F. oxysporum f.sp. cubense	'Gros Michel'	AAA	Symptomatic	Pseudostem	−	+
	EC6-M-GM1	Manabi	La Virgencita	F. oxysporum f.sp. cubense	'Gros Michel'	AAA	Symptomatic	Pseudostem	−	+
	EC6-M-GM2	Manabi	La Virgencita	F. oxysporum f.sp. cubense	'Gros Michel'	AAA	Symptomatic	Pseudostem	−	+
	EC7-M-GM1	Manabi	La Virgencita	F. oxysporum f.sp. cubense	'Gros Michel'	AAA	Symptomatic	Pseudostem	−	+
	EC7-M-GM2	Manabi	La Virgencita	F. oxysporum f.sp. cubense	'Gros Michel'	AAA	Symptomatic	Pseudostem	−	+
	EC8-M-GM1	Manabi	La Virgencita	F. oxysporum f.sp. cubense	'Gros Michel'	AAA	Symptomatic	Pseudostem	−	+
	EC8-M-GM2	Manabi	La Virgencita	F. oxysporum f.sp. cubense	'Gros Michel'	AAA	Symptomatic	Pseudostem	−	+
	EC9-M-GM1	Manabi	La Virgencita	F. oxysporum f.sp. cubense	'Gros Michel'	AAA	Symptomatic	Pseudostem	−	+
	EC9-M-GM2	Manabi	La Virgencita	F. oxysporum f.sp. cubense	'Gros Michel'	AAA	Symptomatic	Pseudostem	−	+
	EC10-M-GM1	Manabi	La Virgencita	F. oxysporum f.sp. cubense	'Gros Michel'	AAA	Symptomatic	Pseudostem	−	+
	EC10-M-GM2	Manabi	La Virgencita	F. oxysporum f.sp. cubense	'Gros Michel'	AAA	Symptomatic	Pseudostem	−	+
	EC11-M-Wm1	Manabi	Las Cristalinas km23	F. oxysporum f.sp. cubense	'Filipino'	AAA	Symptomatic	Pseudostem	−	+
	EC11-M-Wm2	Manabi	Las Cristalinas km23	F. oxysporum f.sp. cubense	'Filipino'	AAA	Symptomatic	Pseudostem	−	+
	EC12-M-Wm1	Manabi	Las Cristalinas km23	F. oxysporum f.sp. cubense	'Filipino'	AAA	Symptomatic	Pseudostem	−	+
	EC12-M-Wm2	Manabi	Las Cristalinas km23	F. oxysporum f.sp. cubense	'Filipino'	AAA	Symptomatic	Pseudostem	−	+
	EC13-M-Wm1	Manabi	Las Cristalinas km23	F. oxysporum f.sp. cubense	'Filipino'	AAA	Symptomatic	Pseudostem	−	+
	EC13-M-Wm2	Manabi	Las Cristalinas km23	F. oxysporum f.sp. cubense	'Filipino'	AAA	Symptomatic	Pseudostem	−	+
	EC14-M-Wm1	Manabi	Las Cristalinas km23	F. oxysporum f.sp. cubense	'Filipino'	AAA	Symptomatic	Pseudostem	−	+
	EC14-M-Wm2	Manabi	Las Cristalinas km23	F. oxysporum f.sp. cubense	'Filipino'	AAA	Symptomatic	Pseudostem	−	+
	EC14-M-Wm4	Manabi	Las Cristalinas km23	F. oxysporum f.sp. cubense	'Filipino'	AAA	Symptomatic	Pseudostem	−	+
	EC15-M-Wm1	Manabi	Las Cristalinas km23	F. oxysporum f.sp. cubense	'Filipino'	AAA	Symptomatic	Pseudostem	−	+
	EC15-M-Wm2	Manabi	Las Cristalinas km23	F. oxysporum f.sp. cubense	'Filipino'	AAA	Symptomatic	Pseudostem	−	+
	EC16-M-GM1	Manabi	La Crespa	F. oxysporum f.sp. cubense	'Gros Michel'	AAA	Symptomatic	Pseudostem	−	+
	EC16-M-GM2	Manabi	La Crespa	F. oxysporum f.sp. cubense	'Gros Michel'	AAA	Symptomatic	Pseudostem	−	+
	EC17-M-GM1	Manabi	La Crespa	F. oxysporum f.sp. cubense	'Gros Michel'	AAA	Symptomatic	Pseudostem	−	+
	EC17-M-GM2	Manabi	La Crespa	F. oxysporum f.sp. cubense	'Gros Michel'	AAA	Symptomatic	Pseudostem	−	+
	EC18-M-GM1	Manabi	La Crespa	F. oxysporum f.sp. cubense	'Gros Michel'	AAA	Symptomatic	Pseudostem	−	+
	EC18-M-GM2	Manabi	La Crespa	F. oxysporum f.sp. cubense	'Gros Michel'	AAA	Symptomatic	Pseudostem	−	+
	EC19-M-GM1	Manabi	N/D	F. oxysporum f.sp. cubense	'Gros Michel'	AAA	Symptomatic	Pseudostem	−	+
	EC19-M-GM2	Manabi	N/D	F. oxysporum f.sp. cubense	'Gros Michel'	AAA	Symptomatic	Pseudostem	−	+
	EC20-M-GM1	Manabi	N/D	F. oxysporum f.sp. cubense	'Gros Michel'	AAA	Symptomatic	Pseudostem	−	+
	EC20-M-GM2	Manabi	N/D	F. oxysporum f.sp. cubense	'Gros Michel'	AAA	Symptomatic	Pseudostem	−	+
	EC21-M-GM1	Manabi	N/D	F. oxysporum f.sp. cubense	'Gros Michel'	AAA	Symptomatic	Pseudostem	−	+
	EC21-M-GM2	Manabi	N/D	F. oxysporum f.sp. cubense	'Gros Michel'	AAA	Symptomatic	Pseudostem	−	+
	EC22-M-GM1	Manabi	N/D	F. oxysporum f.sp. cubense	'Gros Michel'	AAA	Symptomatic	Pseudostem	−	+
	EC22-M-GM2	Manabi	N/D	F. oxysporum f.sp. cubense	'Gros Michel'	AAA	Symptomatic	Pseudostem	−	+
	EC23-M-GM1	Manabi	N/D	F. oxysporum f.sp. cubense	'Gros Michel'	AAA	Symptomatic	Pseudostem	−	+
	EC23-M-GM2	Manabi	N/D	F. oxysporum f.sp. cubense	'Gros Michel'	AAA	Symptomatic	Pseudostem	−	+
	EC24-M-GM1	Manabi	N/D	F. oxysporum f.sp. cubense	'Gros Michel'	AAA	Symptomatic	Pseudostem	−	+
	EC24-M-GM2	Manabi	N/D	F. oxysporum f.sp. cubense	'Gros Michel'	AAA	Symptomatic	Pseudostem	−	+
	EC25-M-GM1	Manabi	Jacinto Ricaurte	F. oxysporum f.sp. cubense	'Gros Michel'	AAA	Symptomatic	Pseudostem	−	+
	EC25-M-GM2	Manabi	Jacinto Ricaurte	F. oxysporum f.sp. cubense	'Gros Michel'	AAA	Symptomatic	Pseudostem	−	+
	EC26-M-GM1	Manabi	Jacinto Ricaurte	F. oxysporum f.sp. cubense	'Gros Michel'	AAA	Symptomatic	Pseudostem	−	+
	EC26-M-GM2	Manabi	Jacinto Ricaurte	F. oxysporum f.sp. cubense	'Gros Michel'	AAA	Symptomatic	Pseudostem	−	+
	EC27-M-GM1	Manabi	Jacinto Ricaurte	F. oxysporum f.sp. cubense	'Gros Michel'	AAA	Symptomatic	Pseudostem	−	+
	EC27-M-GM2	Manabi	Jacinto Ricaurte	F. oxysporum f.sp. cubense	'Gros Michel'	AAA	Symptomatic	Pseudostem	−	+
	EC28-M-GM1	Manabi	Chone	F. oxysporum f.sp. cubense	'Gros Michel'	AAA	Symptomatic	Pseudostem	−	+
	EC28-M-GM2	Manabi	Chone	F. oxysporum f.sp. cubense	'Gros Michel'	AAA	Symptomatic	Pseudostem	−	+
	EC29-M-GM1	Manabi	Chone	F. oxysporum f.sp. cubense	'Gros Michel'	AAA	Symptomatic	Pseudostem	−	+
	EC29-M-GM2	Manabi	Chone	F. oxysporum f.sp. cubense	'Gros Michel'	AAA	Symptomatic	Pseudostem	−	+
	EC30-M-GM1	Manabi	Portoviejo	F. oxysporum f.sp. cubense	'Gros Michel'	AAA	Symptomatic	Pseudostem	−	+
	EC31-M-GM1	Manabi	Portoviejo	F. oxysporum f.sp. cubense	'Gros Michel'	AAA	Symptomatic	Pseudostem	−	+
	EC31-M-GM2	Manabi	Portoviejo	F. oxysporum f.sp. cubense	'Gros Michel'	AAA	Symptomatic	Pseudostem	−	+
	EC32-M-GM1	Manabi	Portoviejo	F. oxysporum f.sp. cubense	'Gros Michel'	AAA	Symptomatic	Pseudostem	−	+
	EC32-M-GM2	Manabi	Portoviejo	F. oxysporum f.sp. cubense	'Gros Michel'	AAA	Symptomatic	Pseudostem	−	+
	EC33-M-GM1	Manabi	EL Paramo	F. oxysporum f.sp. cubense	'Gros Michel'	AAA	Symptomatic	Pseudostem	−	+
	EC33-M-GM2	Manabi	EL Paramo	F. oxysporum f.sp. cubense	'Gros Michel'	AAA	Symptomatic	Pseudostem	−	+
	EC34-M-GM1	Manabi	EL Paramo	F. oxysporum f.sp. cubense	'Gros Michel'	AAA	Symptomatic	Pseudostem	−	+
	EC34-M-GM2	Manabi	EL Paramo	F. oxysporum f.sp. cubense	'Gros Michel'	AAA	Symptomatic	Pseudostem	−	+
	EC35-M-GM1	Manabi	EL Paramo	F. oxysporum f.sp. cubense	'Gros Michel'	AAA	Symptomatic	Pseudostem	−	+
	EC35-M-GM2	Manabi	EL Paramo	F. oxysporum f.sp. cubense	'Gros Michel'	AAA	Symptomatic	Pseudostem	−	+
	EC36-M-GM1	Manabi	EL Paramo	F. oxysporum f.sp. cubense	'Gros Michel'	AAA	Symptomatic	Pseudostem	−	+
	EC36-M-GM2	Manabi	EL Paramo	F. oxysporum f.sp. cubense	'Gros Michel'	AAA	Symptomatic	Pseudostem	−	+
	EC37-M-GM1	Manabi	EL Paramo	F. oxysporum f.sp. cubense	'Gros Michel'	AAA	Symptomatic	Pseudostem	−	+
	EC37-M-GM2	Manabi	EL Paramo	F. oxysporum f.sp. cubense	'Gros Michel'	AAA	Symptomatic	Pseudostem	−	+
	EC38-M-GM1	Manabi	Montalvo	F. oxysporum f.sp. cubense	'Gros Michel'	AAA	Symptomatic	Pseudostem	−	+
	EC38-M-GM2	Manabi	Montalvo	F. oxysporum f.sp. cubense	'Gros Michel'	AAA	Symptomatic	Pseudostem	−	+
	EC39-M-GM1	Manabi	Montalvo	F. oxysporum f.sp. cubense	'Gros Michel'	AAA	Symptomatic	Pseudostem	−	+
	EC39-M-GM2	Manabi	Montalvo	F. oxysporum f.sp. cubense	'Gros Michel'	AAA	Symptomatic	Pseudostem	−	+
	EC40-M-GM1	Manabi	Montalvo	F. oxysporum f.sp. cubense	'Gros Michel'	AAA	Symptomatic	Pseudostem	−	+
	EC40-M-GM2	Manabi	Montalvo	F. oxysporum f.sp. cubense	'Gros Michel'	AAA	Symptomatic	Pseudostem	−	+
	EC41-M-GM1	Manabi	Montalvo	F. oxysporum f.sp. cubense	'Gros Michel'	AAA	Symptomatic	Pseudostem	−	+
	EC41-M-GM2	Manabi	Montalvo	F. oxysporum f.sp. cubense	'Gros Michel'	AAA	Symptomatic	Pseudostem	−	+
	EC42-M-GM1	Manabi	Montalvo	F. oxysporum f.sp. cubense	'Gros Michel'	AAA	Symptomatic	Pseudostem	−	+
	EC42-M-GM2	Manabi	Montalvo	F. oxysporum f.sp. cubense	'Gros Michel'	AAA	Symptomatic	Pseudostem	−	+
	EC43-M-GM1	Manabi	Montalvo	F. oxysporum f.sp. cubense	'Gros Michel'	AAA	Symptomatic	Pseudostem	−	+
	EC43-M-GM2	Manabi	Montalvo	F. oxysporum f.sp. cubense	'Gros Michel'	AAA	Symptomatic	Pseudostem	−	+
	EC44-M-GM1	Manabi	Montalvo	F. oxysporum f.sp. cubense	'Gros Michel'	AAA	Symptomatic	Pseudostem	−	+
	EC44-M-GM2	Manabi	Montalvo	F. oxysporum f.sp. cubense	'Gros Michel'	AAA	Symptomatic	Pseudostem	−	+
	EC45-M-GM2	Manabi	Montalvo	F. oxysporum f.sp. cubense	'Gros Michel'	AAA	Symptomatic	Pseudostem	−	+
	EC46-M-GM1	Manabi	Montalvo	F. oxysporum f.sp. cubense	'Gros Michel'	AAA	Symptomatic	Pseudostem	−	+
	EC46-M-GM2	Manabi	Montalvo	F. oxysporum f.sp. cubense	'Gros Michel'	AAA	Symptomatic	Pseudostem	−	+
	EC47-M-GM1	Manabi	Pajan	F. oxysporum f.sp. cubense	'Gros Michel'	AAA	Symptomatic	Pseudostem	−	+
	EC47-M-GM2	Manabi	Pajan	F. oxysporum f.sp. cubense	'Gros Michel'	AAA	Symptomatic	Pseudostem	−	+
	EC49-M-GM1	Manabi	Pajan	F. oxysporum f.sp. cubense	'Gros Michel'	AAA	Symptomatic	Pseudostem	−	+
	EC49-M-GM2	Manabi	Pajan	F. oxysporum f.sp. cubense	'Gros Michel'	AAA	Symptomatic	Pseudostem	−	+
	EC50-M-GM1	Manabi	Pajan	F. oxysporum f.sp. cubense	'Gros Michel'	AAA	Symptomatic	Pseudostem	−	+
	EC50-M-GM2	Manabi	Pajan	F. oxysporum f.sp. cubense	'Gros Michel'	AAA	Symptomatic	Pseudostem	−	+
	EC51-M-GM1	Manabi	Eloy Alfaro	F. oxysporum f.sp. cubense	'Gros Michel'	AAA	Symptomatic	Pseudostem	−	+
	EC51-M-GM2	Manabi	Eloy Alfaro	F. oxysporum f.sp. cubense	'Gros Michel'	AAA	Symptomatic	Pseudostem	−	+
	EC51-M-GM3	Manabi	Eloy Alfaro	F. oxysporum f.sp. cubense	'Gros Michel'	AAA	Symptomatic	Pseudostem	−	+
	EC52-M-GM1	Manabi	Eloy Alfaro	F. oxysporum f.sp. cubense	'Gros Michel'	AAA	Symptomatic	Pseudostem	−	+
	EC52-M-GM2	Manabi	Eloy Alfaro	F. oxysporum f.sp. cubense	'Gros Michel'	AAA	Symptomatic	Pseudostem	−	+
	EC52-M-GM3	Manabi	Eloy Alfaro	F. oxysporum f.sp. cubense	'Gros Michel'	AAA	Symptomatic	Pseudostem	−	+
	EC53-M-GM2	Manabi	Eloy Alfaro	F. oxysporum f.sp. cubense	'Gros Michel'	AAA	Symptomatic	Pseudostem	−	+
	EC54-M-GM1	Manabi	Eloy Alfaro	F. oxysporum f.sp. cubense	'Gros Michel'	AAA	Symptomatic	Pseudostem	−	+
	EC2-G-GM1	Guayas	Milagro-Carrizal	F. oxysporum f.sp. cubense	'Gros Michel'	AAA	Symptomatic	Pseudostem	−	+
	EC2-G-GM2	Guayas	Milagro-Carrizal	F. oxysporum f.sp. cubense	'Gros Michel'	AAA	Symptomatic	Pseudostem	−	+
	EC2-G-GM3	Guayas	Milagro-Carrizal	F. oxysporum f.sp. cubense	'Gros Michel'	AAA	Symptomatic	Pseudostem	−	+
	EC4-G-GM1	Guayas	Milagro-Carrizal	F. oxysporum f.sp. cubense	'Gros Michel'	AAA	Symptomatic	Pseudostem	−	+
	EC4-G-GM2	Guayas	Milagro-Carrizal	F. oxysporum f.sp. cubense	'Gros Michel'	AAA	Symptomatic	Pseudostem	−	+
	EC5-G-GM1	Guayas	Milagro-Carrizal	F. oxysporum f.sp. cubense	'Gros Michel'	AAA	Symptomatic	Pseudostem	−	+
	EC5-G-GM2	Guayas	Milagro-Carrizal	F. oxysporum f.sp. cubense	'Gros Michel'	AAA	Symptomatic	Pseudostem	−	+
	EC6-G-GM1	Guayas	Mata de Platano	F. oxysporum f.sp. cubense	'Gros Michel'	AAA	Symptomatic	Pseudostem	−	+
	EC6-G-GM2	Guayas	Mata de Platano	F. oxysporum f.sp. cubense	'Gros Michel'	AAA	Symptomatic	Pseudostem	−	+
	EC6-G-GM3	Guayas	Mata de Platano	F. oxysporum f.sp. cubense	'Gros Michel'	AAA	Symptomatic	Pseudostem	−	+
	EC7-G-GM1	Guayas	Simon Bolivar	F. oxysporum f.sp. cubense	'Gros Michel'	AAA	Symptomatic	Pseudostem	−	+
	EC7-G-GM2	Guayas	Simon Bolivar	F. oxysporum f.sp. cubense	'Gros Michel'	AAA	Symptomatic	Pseudostem	−	+
	EC8-G-GM1	Guayas	Simon Bolivar	F. oxysporum f.sp. cubense	'Gros Michel'	AAA	Symptomatic	Pseudostem	−	+
	EC8-G-GM2	Guayas	Simon Bolivar	F. oxysporum f.sp. cubense	'Gros Michel'	AAA	Symptomatic	Pseudostem	−	+
	EC8-G-GM3	Guayas	Simon Bolivar	F. oxysporum f.sp. cubense	'Gros Michel'	AAA	Symptomatic	Pseudostem	−	+
	EC8-G-GM4	Guayas	Simon Bolivar	F. oxysporum f.sp. cubense	'Gros Michel'	AAA	Symptomatic	Pseudostem	−	+
	EC9-G-GM1	Guayas	Simon Bolivar	F. oxysporum f.sp. cubense	'Gros Michel'	AAA	Symptomatic	Pseudostem	−	+
	EC9-G-GM2	Guayas	Simon Bolivar	F. oxysporum f.sp. cubense	'Gros Michel'	AAA	Symptomatic	Pseudostem	−	+
	EC9-G-GM3	Guayas	Simon Bolivar	F. oxysporum f.sp. cubense	'Gros Michel'	AAA	Symptomatic	Pseudostem	−	+
	EC10-G-GM1	Guayas	Simon Bolivar	F. oxysporum f.sp. cubense	'Gros Michel'	AAA	Symptomatic	Pseudostem	−	+
	EC10-G-GM2	Guayas	Simon Bolivar	F. oxysporum f.sp. cubense	'Gros Michel'	AAA	Symptomatic	Pseudostem	−	+
	EC10-G-GM3	Guayas	Simon Bolivar	F. oxysporum f.sp. cubense	'Gros Michel'	AAA	Symptomatic	Pseudostem	−	+
	EC11-G-GM1	Guayas	Sto Domingo-Los negros	F. oxysporum f.sp. cubense	'Gros Michel'	AAA	Symptomatic	Pseudostem	−	+
	EC11-G-GM2	Guayas	Sto Domingo-Los negros	F. oxysporum f.sp. cubense	'Gros Michel'	AAA	Symptomatic	Pseudostem	−	+
	EC11-G-GM3	Guayas	Sto Domingo-Los negros	F. oxysporum f.sp. cubense	'Gros Michel'	AAA	Symptomatic	Pseudostem	−	+
	EC11-G-GM4	Guayas	Sto Domingo-Los negros	F. oxysporum f.sp. cubense	'Gros Michel'	AAA	Symptomatic	Pseudostem	−	+
	EC12-G-GM1	Guayas	Sto Domingo-Los negros	F. oxysporum f.sp. cubense	'Gros Michel'	AAA	Symptomatic	Pseudostem	−	+
	EC12-G-GM2	Guayas	Sto Domingo-Los negros	F. oxysporum f.sp. cubense	'Gros Michel'	AAA	Symptomatic	Pseudostem	−	+
	EC12-G-GM3	Guayas	Sto Domingo-Los negros	F. oxysporum f.sp. cubense	'Gros Michel'	AAA	Symptomatic	Pseudostem	−	+
	EC13-G-GM1	Guayas	Sto Domingo-Los negros	F. oxysporum f.sp. cubense	'Gros Michel'	AAA	Symptomatic	Pseudostem	−	+
	EC14-G-GM1	Guayas	Sto Domingo-Los negros	F. oxysporum f.sp. cubense	'Gros Michel'	AAA	Symptomatic	Pseudostem	−	+
	EC14-G-GM2	Guayas	Sto Domingo-Los negros	F. oxysporum f.sp. cubense	'Gros Michel'	AAA	Symptomatic	Pseudostem	−	+
	EC15-G-GM2	Guayas	Sto Domingo-Los negros	F. oxysporum f.sp. cubense	'Gros Michel'	AAA	Symptomatic	Pseudostem	−	+
	EC16-G-GM1	Guayas	Sto Domingo-Los negros	F. oxysporum f.sp. cubense	'Gros Michel'	AAA	Symptomatic	Pseudostem	−	+
	EC17-G-GM1	Guayas	Sto Domingo-Los negros	F. oxysporum f.sp. cubense	'Gros Michel'	AAA	Symptomatic	Pseudostem	−	+
	EC17-G-GM2	Guayas	Sto Domingo-Los negros	F. oxysporum f.sp. cubense	'Gros Michel'	AAA	Symptomatic	Pseudostem	−	+
	EC17-G-GM3	Guayas	Sto Domingo-Los negros	F. oxysporum f.sp. cubense	'Gros Michel'	AAA	Symptomatic	Pseudostem	−	+
	EC18-G-GM1	Guayas	Centro Poblado	F. oxysporum f.sp. cubense	'Gros Michel'	AAA	Symptomatic	Pseudostem	−	+
	EC18-G-GM2	Guayas	Centro Poblado	F. oxysporum f.sp. cubense	'Gros Michel'	AAA	Symptomatic	Pseudostem	−	+
	EC18-G-GM3	Guayas	Centro Poblado	F. oxysporum f.sp. cubense	'Gros Michel'	AAA	Symptomatic	Pseudostem	−	+
	EC19-G-GM2	Guayas	Mariscal Sucre	F. oxysporum f.sp. cubense	'Gros Michel'	AAA	Symptomatic	Pseudostem	−	+
	EC19-G-GM3	Guayas	Mariscal Sucre	F. oxysporum f.sp. cubense	'Gros Michel'	AAA	Symptomatic	Pseudostem	−	+
	EC20-G-GM1	Guayas	Los Monos-Milagro	F. oxysporum f.sp. cubense	'Gros Michel'	AAA	Symptomatic	Pseudostem	−	+
	EC20-G-GM2	Guayas	Los Monos-Milagro	F. oxysporum f.sp. cubense	'Gros Michel'	AAA	Symptomatic	Pseudostem	−	+
	EC20-G-GM3	Guayas	Los Monos-Milagro	F. oxysporum f.sp. cubense	'Gros Michel'	AAA	Symptomatic	Pseudostem	−	+
	EC21-G-GM2	Guayas	Los Monos-Milagro	F. oxysporum f.sp. cubense	'Gros Michel'	AAA	Symptomatic	Pseudostem	−	+
	EC21-G-GM3	Guayas	Los Monos-Milagro	F. oxysporum f.sp. cubense	'Gros Michel'	AAA	Symptomatic	Pseudostem	−	+
	EC22-G-GM1	Guayas	Los Monos-Milagro	F. oxysporum f.sp. cubense	'Gros Michel'	AAA	Symptomatic	Pseudostem	−	+
	EC22-G-GM2	Guayas	Los Monos-Milagro	F. oxysporum f.sp. cubense	'Gros Michel'	AAA	Symptomatic	Pseudostem	−	+
	EC23-G-GM1	Guayas	Rcto. 10 de Agosto	F. oxysporum f.sp. cubense	'Gros Michel'	AAA	Symptomatic	Pseudostem	−	+
	EC23-G-GM2	Guayas	Rcto. 10 de Agosto	F. oxysporum f.sp. cubense	'Gros Michel'	AAA	Symptomatic	Pseudostem	−	+
	EC23-G-GM3	Guayas	Rcto. 10 de Agosto	F. oxysporum f.sp. cubense	'Gros Michel'	AAA	Symptomatic	Pseudostem	−	+
	EC24-G-GM1	Guayas	Progreso	F. oxysporum f.sp. cubense	'Gros Michel'	AAA	Symptomatic	Pseudostem	−	+
	EC24-G-GM3	Guayas	Progreso	F. oxysporum f.sp. cubense	'Gros Michel'	AAA	Symptomatic	Pseudostem	−	+
	EC25-G-GM1	Guayas	Naranjal-EL Aromo	F. oxysporum f.sp. cubense	'Gros Michel'	AAA	Symptomatic	Pseudostem	−	+
	EC25-G-GM2	Guayas	Naranjal-EL Aromo	F. oxysporum f.sp. cubense	'Gros Michel'	AAA	Symptomatic	Pseudostem	−	+
	EC27-G-GM1	Guayas	Naranjal-EL Aromo	F. oxysporum f.sp. cubense	'Gros Michel'	AAA	Symptomatic	Pseudostem	−	+
	EC27-G-GM2	Guayas	Naranjal-EL Aromo	F. oxysporum f.sp. cubense	'Gros Michel'	AAA	Symptomatic	Pseudostem	−	+
	EC30-G-GM1	Guayas	Centro Poblado	F. oxysporum f.sp. cubense	'Gros Michel'	AAA	Symptomatic	Pseudostem	−	+
	EC30-G-GM2	Guayas	Centro Poblado	F. oxysporum f.sp. cubense	'Gros Michel'	AAA	Symptomatic	Pseudostem	−	+
	EC30-G-GM3	Guayas	Centro Poblado	F. oxysporum f.sp. cubense	'Gros Michel'	AAA	Symptomatic	Pseudostem	−	+
	EC30-G-GM4	Guayas	Centro Poblado	F. oxysporum f.sp. cubense	'Gros Michel'	AAA	Symptomatic	Pseudostem	−	+
	EC31-G-GM1	Guayas	Centro Poblado	F. oxysporum f.sp. cubense	'Gros Michel'	AAA	Symptomatic	Pseudostem	−	+
	EC32-G-GM1	Guayas	Centro Poblado	F. oxysporum f.sp. cubense	'Gros Michel'	AAA	Symptomatic	Pseudostem	−	+
	EC32-G-GM2	Guayas	Centro Poblado	F. oxysporum f.sp. cubense	'Gros Michel'	AAA	Symptomatic	Pseudostem	−	+
	EC33-G-GM1	Guayas	Centro Poblado	F. oxysporum f.sp. cubense	'Gros Michel'	AAA	Symptomatic	Pseudostem	−	+
	EC33-G-GM2	Guayas	Centro Poblado	F. oxysporum f.sp. cubense	'Gros Michel'	AAA	Symptomatic	Pseudostem	−	+
	EC33-G-GM3	Guayas	Centro Poblado	F. oxysporum f.sp. cubense	'Gros Michel'	AAA	Symptomatic	Pseudostem	−	+
	EC35-G-GM1	Guayas	Mata de Platano	F. oxysporum f.sp. cubense	'Gros Michel'	AAA	Symptomatic	Pseudostem	−	+
	EC35-G-GM2	Guayas	Mata de Platano	F. oxysporum f.sp. cubense	'Gros Michel'	AAA	Symptomatic	Pseudostem	−	+
	EC35-G-GM3	Guayas	Mata de Platano	F. oxysporum f.sp. cubense	'Gros Michel'	AAA	Symptomatic	Pseudostem	−	+
	EC35-G-GM4	Guayas	Mata de Platano	F. oxysporum f.sp. cubense	'Gros Michel'	AAA	Symptomatic	Pseudostem	−	+
	EC35-G-GM5	Guayas	Mata de Platano	F. oxysporum f.sp. cubense	'Gros Michel'	AAA	Symptomatic	Pseudostem	−	+
	EC35-G-GM6	Guayas	Mata de Platano	F. oxysporum f.sp. cubense	'Gros Michel'	AAA	Symptomatic	Pseudostem	−	+
	EC36-G-GM1	Guayas	Mata de Platano	F. oxysporum f.sp. cubense	'Gros Michel'	AAA	Symptomatic	Pseudostem	−	+
	EC36-G-GM2	Guayas	Mata de Platano	F. oxysporum f.sp. cubense	'Gros Michel'	AAA	Symptomatic	Pseudostem	−	+
	EC36-G-GM3	Guayas	Mata de Platano	F. oxysporum f.sp. cubense	'Gros Michel'	AAA	Symptomatic	Pseudostem	−	+
	EC36-G-GM4	Guayas	Mata de Platano	F. oxysporum f.sp. cubense	'Gros Michel'	AAA	Symptomatic	Pseudostem	−	+
	EC10-B-GM1	Bolivar	Caluma	F. oxysporum f.sp. cubense	'Gros Michel'	AAA	Symptomatic	Pseudostem	−	+
	EC10-B-GM3	Bolivar	Caluma	F. oxysporum f.sp. cubense	'Gros Michel'	AAA	Symptomatic	Pseudostem	−	+
	EC11-B-OR1	Bolivar	Caluma	F. oxysporum	'Orito'	AA	Asymptomatic	Roots	−	+
	EC11-B-OR2	Bolivar	Caluma	F. oxysporum	'Orito'	AA	Asymptomatic	Roots	−	+
	EC1-LR-CV1	Los Rios	Pueblo Viejo	F. oxysporum	Cavendish	AAA	Asymptomatic	Roots	−	+
	EC4-LR-CV1	Los Rios	Pueblo Viejo	F. oxysporum	Cavendish	AAA	Asymptomatic	Roots	+	−
	EC5-LR-GM1	Los Rios	Pueblo Viejo	F. oxysporum	'Gros Michel'	AAA	Asymptomatic	Roots	+	−
	EC7-LR-PL1	Los Rios	Canauate	F. oxysporum	'Barraganete'	AAB	Asymptomatic	Roots	+	−
	EC8-LR-PL2	Los Rios	Canauate	F. oxysporum	'Barraganete'	AAB	Asymptomatic	Roots	+	−
	EC16-LR-GM1	Los Rios	San Francisco-Baba	F. oxysporum f.sp. cubense	'Gros Michel'	AAA	Symptomatic	Pseudostem	−	+
	EC16-LR-GM2	Los Rios	San Francisco-Baba	F. oxysporum f.sp. cubense	'Gros Michel'	AAA	Symptomatic	Pseudostem	−	+
	EC16-LR-GM3	Los Rios	San Francisco-Baba	F. oxysporum f.sp. cubense	'Gros Michel'	AAA	Symptomatic	Pseudostem	−	+
	EC16-LR-GM4	Los Rios	San Francisco-Baba	F. oxysporum f.sp. cubense	'Gros Michel'	AAA	Symptomatic	Pseudostem	−	+
	EC17-LR-GM2	Los Rios	San Francisco-Baba	F. oxysporum f.sp. cubense	'Gros Michel'	AAA	Symptomatic	Pseudostem	−	+
	EC17-LR-GM3	Los Rios	San Francisco-Baba	F. oxysporum f.sp. cubense	'Gros Michel'	AAA	Symptomatic	Pseudostem	−	+
	EC17-LR-GM5	Los Rios	San Francisco-Baba	F. oxysporum f.sp. cubense	'Gros Michel'	AAA	Symptomatic	Pseudostem	−	+
	EC17-LR-GM6	Los Rios	San Francisco-Baba	F. oxysporum f.sp. cubense	'Gros Michel'	AAA	Symptomatic	Pseudostem	−	+
	EC17-LR-GM7	Los Rios	San Francisco-Baba	F. oxysporum f.sp. cubense	'Gros Michel'	AAA	Symptomatic	Pseudostem	−	+
	EC18-LR-GM1	Los Rios	San Francisco-Baba	F. oxysporum f.sp. cubense	'Gros Michel'	AAA	Symptomatic	Pseudostem	−	+
	EC18-LR-GM2	Los Rios	San Francisco-Baba	F. oxysporum f.sp. cubense	'Gros Michel'	AAA	Symptomatic	Pseudostem	−	+
	EC18-LR-GM3	Los Rios	San Francisco-Baba	F. oxysporum f.sp. cubense	'Gros Michel'	AAA	Symptomatic	Pseudostem	−	+
	EC18-LR-GM4	Los Rios	San Francisco-Baba	F. oxysporum f.sp. cubense	'Gros Michel'	AAA	Symptomatic	Pseudostem	−	+
	EC18-LR-GM6	Los Rios	San Francisco-Baba	F. oxysporum f.sp. cubense	'Gros Michel'	AAA	Symptomatic	Pseudostem	−	+
	EC19-LR-GM2	Los Rios	Quevedo-Mocache	F. oxysporum f.sp. cubense	'Gros Michel'	AAA	Symptomatic	Pseudostem	−	+
	EC19-LR-GM3	Los Rios	Quevedo-Mocache	F. oxysporum f.sp. cubense	'Gros Michel'	AAA	Symptomatic	Pseudostem	−	+
	EC19-LR-GM4	Los Rios	Quevedo-Mocache	F. oxysporum f.sp. cubense	'Gros Michel'	AAA	Symptomatic	Pseudostem	−	+
	EC19-LR-GM5	Los Rios	Quevedo-Mocache	F. oxysporum f.sp. cubense	'Gros Michel'	AAA	Symptomatic	Pseudostem	−	+
	EC20-LR-GM1	Los Rios	Quevedo-Mocache	F. oxysporum f.sp. cubense	'Gros Michel'	AAA	Symptomatic	Pseudostem	−	+
	EC20-LR-GM2	Los Rios	Quevedo-Mocache	F. oxysporum f.sp. cubense	'Gros Michel'	AAA	Symptomatic	Pseudostem	−	+
	EC20-LR-GM3	Los Rios	Quevedo-Mocache	F. oxysporum f.sp. cubense	'Gros Michel'	AAA	Symptomatic	Pseudostem	−	+
	EC21-LR-GM1	Los Rios	Quevedo-Mocache	F. oxysporum f.sp. cubense	'Gros Michel'	AAA	Symptomatic	Pseudostem	−	+
	EC21-LR-GM2	Los Rios	Quevedo-Mocache	F. oxysporum f.sp. cubense	'Gros Michel'	AAA	Symptomatic	Pseudostem	−	+
	EC22-LR-GM1	Los Rios	Quevedo-Mocache	F. oxysporum f.sp. cubense	'Gros Michel'	AAA	Symptomatic	Pseudostem	−	+
	EC22-LR-GM2	Los Rios	Quevedo-Mocache	F. oxysporum f.sp. cubense	'Gros Michel'	AAA	Symptomatic	Pseudostem	−	+
	EC23-LR-GM1	Los Rios	Quevedo-Mocache	F. oxysporum f.sp. cubense	'Gros Michel'	AAA	Symptomatic	Pseudostem	−	+
	EC23-LR-GM4	Los Rios	Quevedo-Mocache	F. oxysporum f.sp. cubense	'Gros Michel'	AAA	Symptomatic	Pseudostem	−	+
	EC24-LR-GM1	Los Rios	Quevedo-Mocache	F. oxysporum f.sp. cubense	'Gros Michel'	AAA	Symptomatic	Pseudostem	−	+
	EC24-LR-GM2	Los Rios	Quevedo-Mocache	F. oxysporum f.sp. cubense	'Gros Michel'	AAA	Symptomatic	Pseudostem	−	+
	EC25-LR-GM1	Los Rios	Quevedo-Mocache	F. oxysporum f.sp. cubense	'Gros Michel'	AAA	Symptomatic	Pseudostem	−	+
	EC26-LR-GM1	Los Rios	Quevedo-Mocache	F. oxysporum f.sp. cubense	'Gros Michel'	AAA	Symptomatic	Pseudostem	−	+
	EC27-LR-GM1	Los Rios	Quevedo-Mocache	F. oxysporum f.sp. cubense	'Gros Michel'	AAA	Symptomatic	Pseudostem	−	+
	EC27-LR-GM2	Los Rios	Quevedo-Mocache	F. oxysporum f.sp. cubense	'Gros Michel'	AAA	Symptomatic	Pseudostem	−	+
	EC28-LR-GM1	Los Rios	Quevedo-Mocache	F. oxysporum f.sp. cubense	'Gros Michel'	AAA	Symptomatic	Pseudostem	−	+
	EC28-LR-GM2	Los Rios	Quevedo-Mocache	F. oxysporum f.sp. cubense	'Gros Michel'	AAA	Symptomatic	Pseudostem	−	+
	EC29-LR-GM1	Los Rios	Quevedo-Mocache	F. oxysporum f.sp. cubense	'Gros Michel'	AAA	Symptomatic	Pseudostem	−	+
	EC29-LR-GM3	Los Rios	Quevedo-Mocache	F. oxysporum f.sp. cubense	'Gros Michel'	AAA	Symptomatic	Pseudostem	−	+
	EC30-LR-GM2	Los Rios	Quevedo-Mocache	F. oxysporum f.sp. cubense	'Gros Michel'	AAA	Symptomatic	Pseudostem	−	+
	EC30-LR-GM3	Los Rios	Quevedo-Mocache	F. oxysporum f.sp. cubense	'Gros Michel'	AAA	Symptomatic	Pseudostem	−	+
	EC31-LR-GM1	Los Rios	Quevedo-Mocache	F. oxysporum f.sp. cubense	'Gros Michel'	AAA	Symptomatic	Pseudostem	−	+
	EC31-LR-GM2	Los Rios	Quevedo-Mocache	F. oxysporum f.sp. cubense	'Gros Michel'	AAA	Symptomatic	Pseudostem	−	+
	EC32-LR-GM1	Los Rios	Quevedo-Mocache	F. oxysporum f.sp. cubense	'Gros Michel'	AAA	Symptomatic	Pseudostem	−	+
	EC32-LR-GM2	Los Rios	Quevedo-Mocache	F. oxysporum f.sp. cubense	'Gros Michel'	AAA	Symptomatic	Pseudostem	−	+
	EC33-LR-GM1	Los Rios	Quevedo-Mocache	F. oxysporum f.sp. cubense	'Gros Michel'	AAA	Symptomatic	Pseudostem	−	+
	EC34-LR-GM2	Los Rios	Quevedo-Mocache	F. oxysporum f.sp. cubense	'Gros Michel'	AAA	Symptomatic	Pseudostem	−	+
	EC35-LR-GM1	Los Rios	Quevedo-Mocache	F. oxysporum f.sp. cubense	'Gros Michel'	AAA	Symptomatic	Pseudostem	−	+
	EC35-LR-GM2	Los Rios	Quevedo-Mocache	F. oxysporum f.sp. cubense	'Gros Michel'	AAA	Symptomatic	Pseudostem	−	+
	EC36-LR-GM1	Los Rios	Quevedo-Mocache	F. oxysporum f.sp. cubense	'Gros Michel'	AAA	Symptomatic	Pseudostem	−	+
	EC36-LR-GM3	Los Rios	Quevedo-Mocache	F. oxysporum f.sp. cubense	'Gros Michel'	AAA	Symptomatic	Pseudostem	−	+
	EC1-SD-GM1	Sto. Domingo	Santo-Domingo	F. oxysporum f.sp. cubense	'Gros Michel'	AAA	Symptomatic	Pseudostem	−	+
	EC1-SD-GM2	Sto. Domingo	Santo-Domingo	F. oxysporum f.sp. cubense	'Gros Michel'	AAA	Symptomatic	Pseudostem	−	+
	EC2-SD-GM3	Sto. Domingo	Santo-Domingo	F. oxysporum f.sp. cubense	'Gros Michel'	AAA	Symptomatic	Pseudostem	−	+
	EC2-SD-GM2	Sto. Domingo	Santo-Domingo	F. oxysporum f.sp. cubense	'Gros Michel'	AAA	Symptomatic	Pseudostem	−	+
	EC3-SD-GM1	Sto. Domingo	Santo-Domingo	F. oxysporum f.sp. cubense	'Gros Michel'	AAA	Symptomatic	Pseudostem	−	+
	EC3-SD-GM2	Sto. Domingo	Santo-Domingo	F. oxysporum f.sp. cubense	'Gros Michel'	AAA	Symptomatic	Pseudostem	−	+
	EC3-SD-GM3	Sto. Domingo	Santo-Domingo	F. oxysporum f.sp. cubense	'Gros Michel'	AAA	Symptomatic	Pseudostem	−	+
	EC1-O-GM1	EL Oro	Brazilia	F. oxysporum f.sp. cubense	'Gros Michel'	AAA	Symptomatic	Pseudostem	−	+
	EC1-O-GM2	EL Oro	Brazilia	F. oxysporum f.sp. cubense	'Gros Michel'	AAA	Symptomatic	Pseudostem	−	+
	EC1-O-GM3	EL Oro	Brazilia	F. oxysporum f.sp. cubense	'Gros Michel'	AAA	Symptomatic	Pseudostem	−	+
	EC2-O-GM1	EL Oro	Brazilia	F. oxysporum f.sp. cubense	'Gros Michel'	AAA	Symptomatic	Pseudostem	−	+
	EC2-O-GM2	EL Oro	Brazilia	F. oxysporum f.sp. cubense	'Gros Michel'	AAA	Symptomatic	Pseudostem	−	+
	EC2-O-GM3	EL Oro	Brazilia	F. oxysporum f.sp. cubense	'Gros Michel'	AAA	Symptomatic	Pseudostem	−	+
	EC3-O-GM1	EL Oro	Brazilia	F. oxysporum f.sp. cubense	'Gros Michel'	AAA	Symptomatic	Pseudostem	−	+
	EC3-O-GM2	EL Oro	Brazilia	F. oxysporum f.sp. cubense	'Gros Michel'	AAA	Symptomatic	Pseudostem	−	+
	EC3-O-GM3	EL Oro	Brazilia	F. oxysporum f.sp. cubense	'Gros Michel'	AAA	Symptomatic	Pseudostem	−	+
	EC4-O-GM1	EL Oro	Brazilia	F. oxysporum f.sp. cubense	'Gros Michel'	AAA	Symptomatic	Pseudostem	−	+
	EC4-O-GM2	EL Oro	Brazilia	F. oxysporum f.sp. cubense	'Gros Michel'	AAA	Symptomatic	Pseudostem	−	+
	EC4-O-GM3	EL Oro	Brazilia	F. oxysporum f.sp. cubense	'Gros Michel'	AAA	Symptomatic	Pseudostem	−	+
	EC5-O-GM1	EL Oro	Brazilia	F. oxysporum f.sp. cubense	'Gros Michel'	AAA	Symptomatic	Pseudostem	−	+
	EC5-O-GM2	EL Oro	Brazilia	F. oxysporum f.sp. cubense	'Gros Michel'	AAA	Symptomatic	Pseudostem	−	+
	EC5-O-GM3	EL Oro	Brazilia	F. oxysporum f.sp. cubense	'Gros Michel'	AAA	Symptomatic	Pseudostem	−	+
	EC6-O-GM1	EL Oro	Brazilia	F. oxysporum f.sp. cubense	'Gros Michel'	AAA	Symptomatic	Pseudostem	−	+
	EC6-O-GM3	EL Oro	Brazilia	F. oxysporum f.sp. cubense	'Gros Michel'	AAA	Symptomatic	Pseudostem	−	+
	EC7-O-GM1	EL Oro	El Guabo	F. oxysporum f.sp. cubense	'Gros Michel'	AAA	Symptomatic	Pseudostem	−	+
	EC7-O-GM2	EL Oro	El Guabo	F. oxysporum f.sp. cubense	'Gros Michel'	AAA	Symptomatic	Pseudostem	−	+
	EC7-O-GM3	EL Oro	El Guabo	F. oxysporum f.sp. cubense	'Gros Michel'	AAA	Symptomatic	Pseudostem	−	+
	EC8-O-GM1	EL Oro	El Guabo	F. oxysporum f.sp. cubense	'Gros Michel'	AAA	Symptomatic	Pseudostem	−	+
	EC8-O-GM2	EL Oro	El Guabo	F. oxysporum f.sp. cubense	'Gros Michel'	AAA	Symptomatic	Pseudostem	−	+
	EC8-O-GM3	EL Oro	El Guabo	F. oxysporum f.sp. cubense	'Gros Michel'	AAA	Symptomatic	Pseudostem	−	+
