# Supplementary material for: Genetic Diversity of Fusarium oxysporum f. sp. cubense, the Fusarium Wilt Pathogen of Banana, in Ecuador
Source: Plants (Basel). 2020 Sep 1;9(9):1133. doi: 10.3390/plants9091133 (PMC7570379; doi:10.3390/plants9091133)
Supplement: Supplementary file 1 [file plants-09-01133-s001.zip › Supplementary Table S2.xlsx]

## Sheet: Hoja1
Genbank accession numbers of Fusarium oxysporum f. sp. cubense and other F. oxysporum isolates used for phylogenetic analyses
		Isolate code	TEF	IGS
		EC8-O-GM1	MK783070	MK754081
		EC8-LR-PL2	MK783071	MK754074
		EC7-LR-PL1	MK783072	MK754073
		EC5-LR-GM1	MK783073	MK754140
		EC4-LR-CV1	MK783074	MK754076
		EC44-M-GM2	MK783075	MK754078
		EC28-LR-GM1	MK783076	MK754080
		EC1-LR-CV1	MK783077	MK754084
		EC15-E-GM1	MK783078	MK754077
		EC14-G-GM1	MK783079	MK754079
		EC11-B-OR2	MK783080	MK754083
		EC10-B-GM3	MK783081	MK754075
		EC1-E-GM1	MT180360	MT180350
		EC1-SD-GM1	MT180361	MT180332
		EC10-E-GM2	MT180362	MT180337
		EC11-M-Wm2	MT180363	MT180344
		EC12-E-GM1	MT180364	MT180356
		EC16-M-GM1	MT180365	MT180353
		EC18-E-GM1	MT180366	MT180346
		EC2-G-GM1	MT180367	MT180329
		EC2-M-GM2	MT180368	MT180357
		EC20-E-GM1	MT180369	MT180342
		EC20-LR-GM2	MT180370	MT180351
		EC20-SD-GM3	MT180371	_
		EC21-G-GM3	MT180372	MT180330
		EC23-G-GM1	MT180373	MT180352
		EC24-G-GM3	MT180374	MT180338
		EC25-G-GM2	MT180375	MT180348
		EC25-M-GM2	MT180376	MT180333
		EC29-M-GM1	MT180377	MT180336
		EC3-O-GM2	MT180378	MT180335
		EC31-G-GM2	MT180379	MT180334
		EC32-M-GM1	MT180380	MT180340
		EC37-M-GM1	MT180381	MT180347
		EC4-E-GM1	MT180382	MT180331
		EC47-M-GM2	MT180383	MT180354
		EC51-M-GM3	MT180384	MT180358
		EC6-G-GM3	MT180385	MT180359
		EC6-M-GM1	MT180386	MT180343
		EC7-E-GM1	MT180387	MT180349
		EC9-G-GM3	MT180388	MT180355
		EC20-M-GM2	MT180389	MT180341
		EC12-M-Wm2	MT180390	MT180345
		EC5-O-GM2	MT180391	MT180339
