# Supplementary figures and images for: Genetic Diversity of Fusarium oxysporum f. sp. cubense, the Fusarium Wilt Pathogen of Banana, in Ecuador
Source: MDPI journal article supplement (doi:10.3390/plants9091133), 2020-09-01

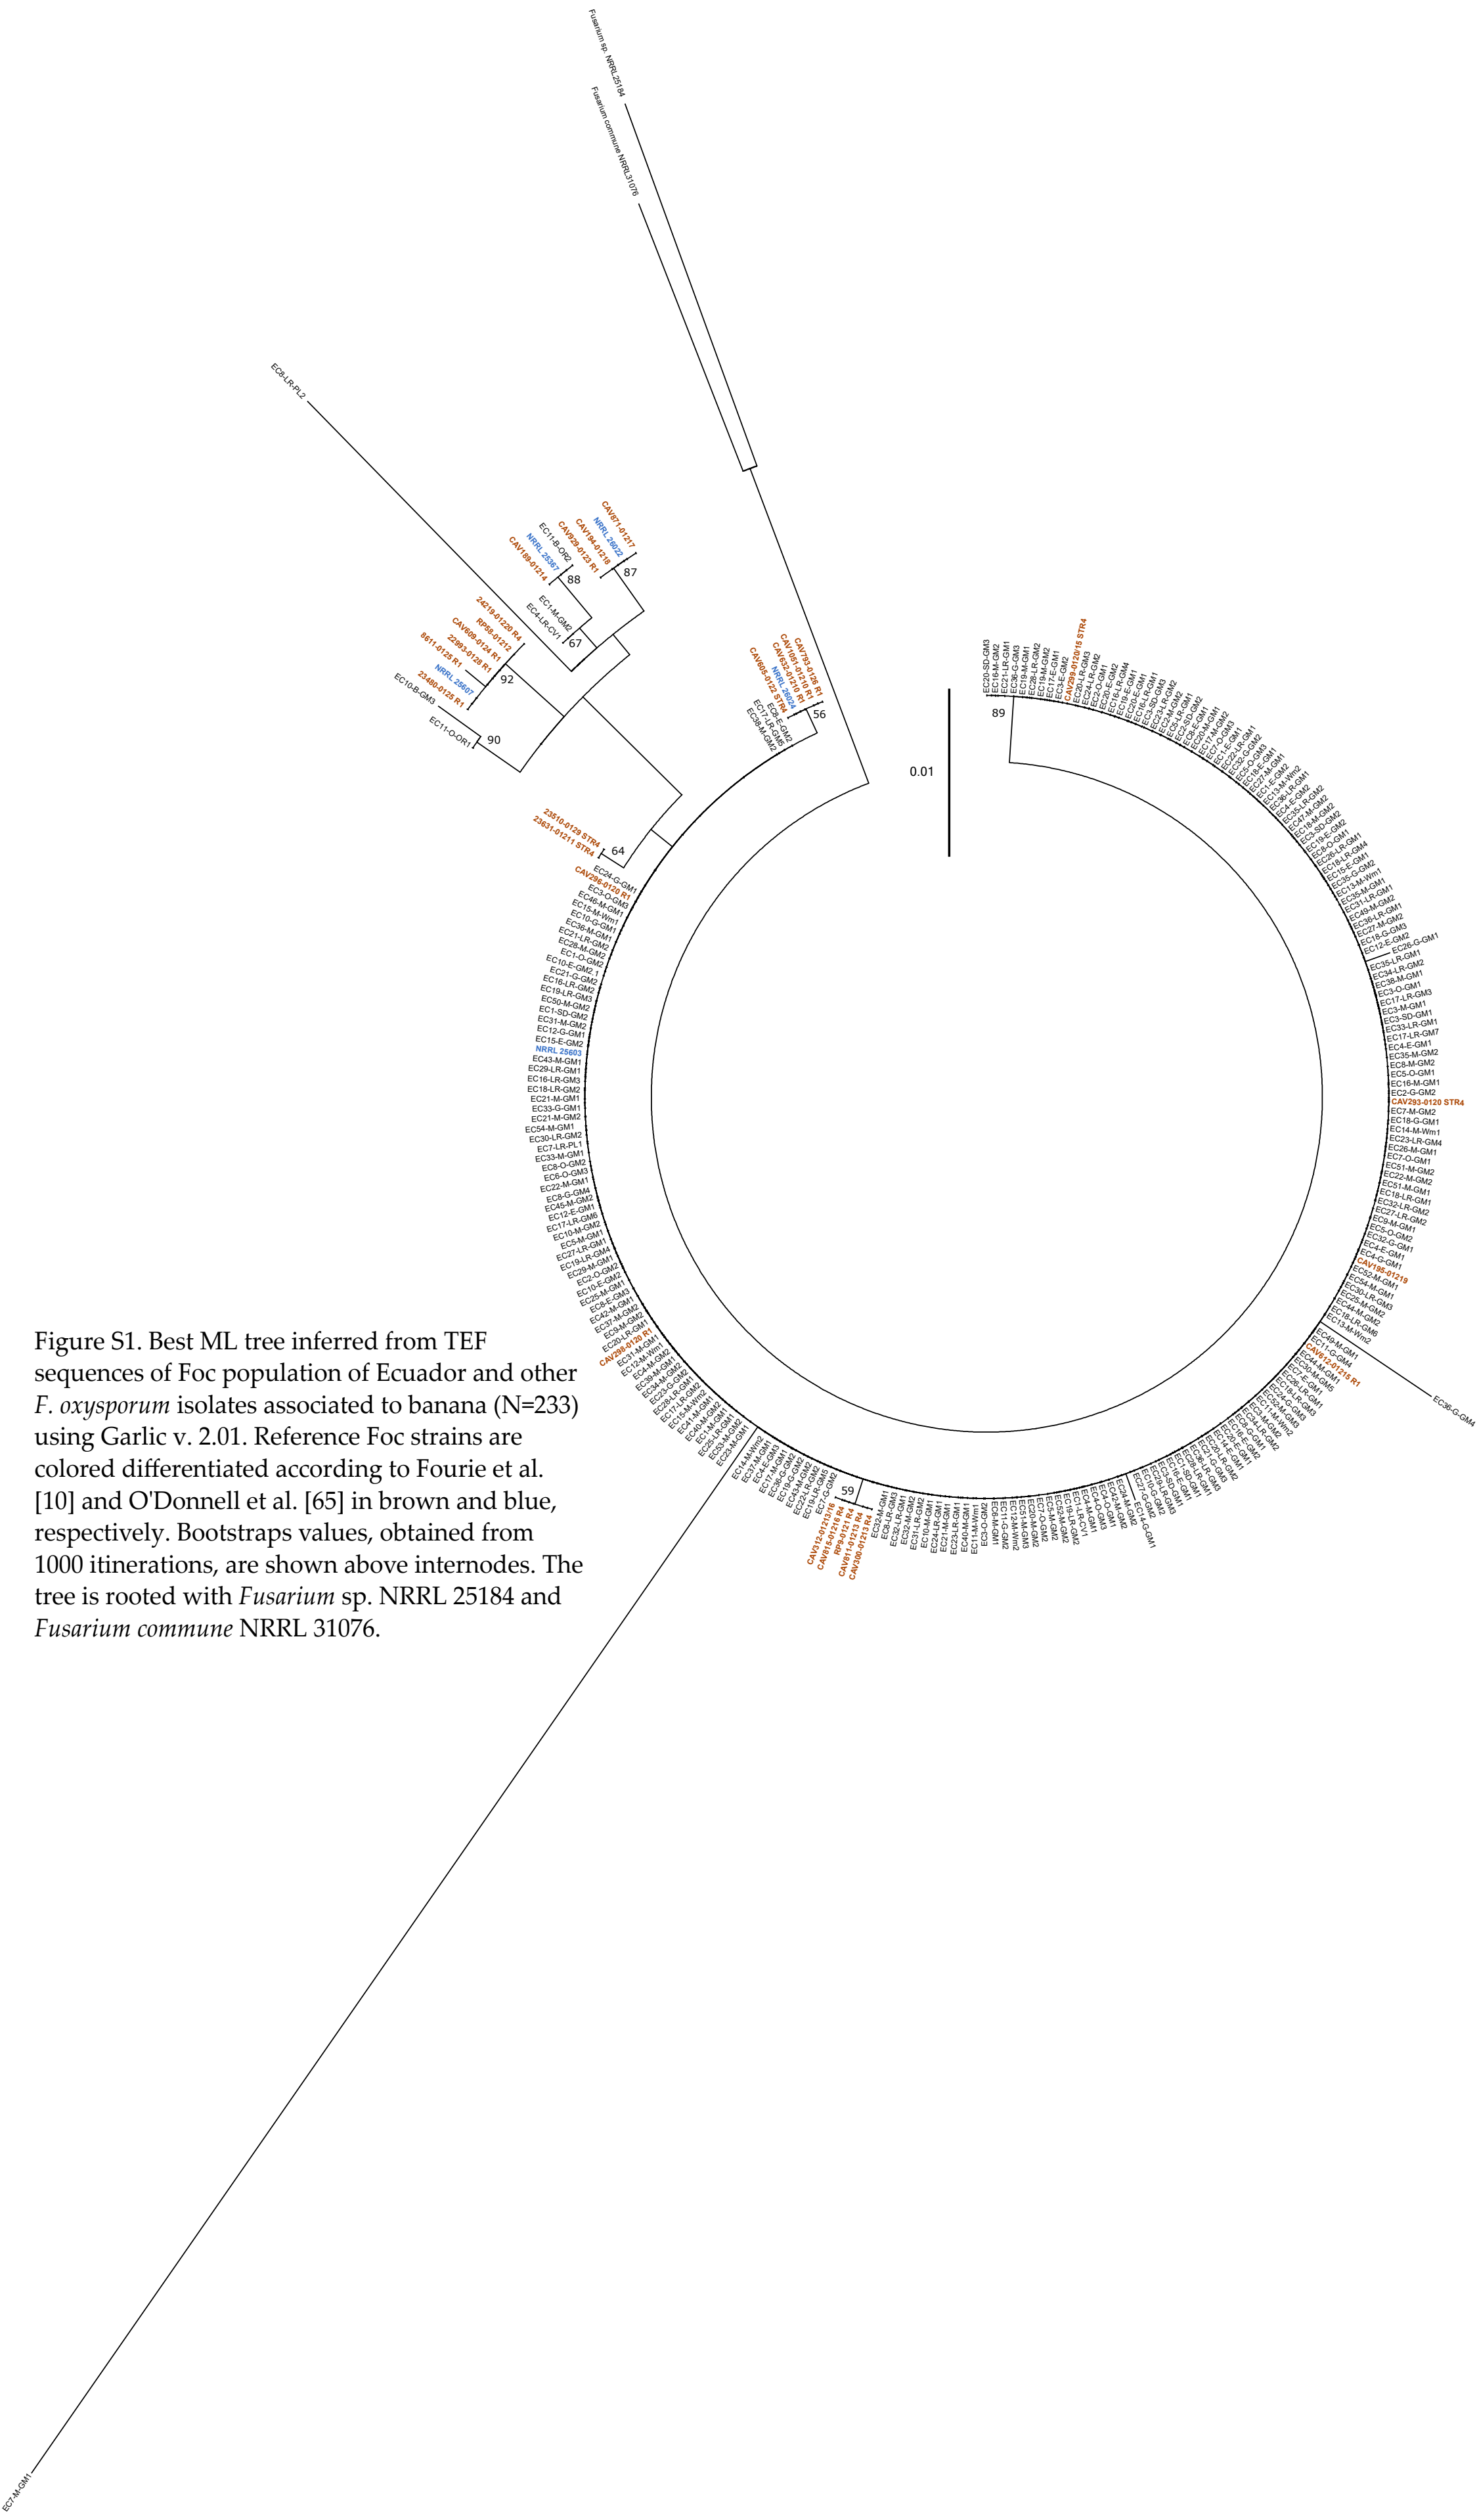

Supplement: s1 [file s1]
